# Supplementary material for: Patient and provider perspectives on how trust influences maternal vaccine acceptance among pregnant women in Kenya
Source: Springer Nature journal article supplement (doi:10.1186/s12913-019-4537-8), 2019-10-24
Supplement: MOESM2 [file 17306938]

**Anthropologic Data Collection Narrative Interview Guide**

**Pregnant Women**

**Introductory Questions:**

1. How old are you?
2. What is your current profession?
3. What is the highest level of education you have completed?

**Elicitation of information on beliefs, attitude and immunization behavior in the context of values and motivational factors**

1. What are the most important factors you consider when you are making health decisions?
2. Who do you trust regarding information relating to your health?

**PROBE:** Healthcare provider, Family, Peers, Media

3. Before this visit, have you seen a healthcare provider for your own health in the last year?
4. What do you know about vaccines?
5. Have you ever received a vaccine before?

*If yes:*

- a. Which one/s?
- b. Do you know what the vaccine prevents again?
- c. Why did you receive the particular vaccine/s?

**PROBE:** doctor/family told you to

6. Where do you receive your vaccination information from?

**Creating Evidence Base for Determinants of Maternal  
Immunization Acceptance in Kenya Protocol V1.3  
English interview guide**

7. Are there any particular advertisements or informational items that you particularly liked related to vaccinations?

**PROBE:** Where did they see it?

**PROBE:** Who was it targeted for?

8. Have you ever refused vaccine for yourself before? Why? Why not?

9. Do you believe that vaccines are safe?

**PROB:** kinds of illnesses shots prevent, side effects, immunity development through shots, are there too many/too few shots, fear that shots might not be as effective in preventing disease etc.

10. Do you know anyone who had a bad reaction to vaccines?

11. Do you think (or know of others who think) vaccines themselves make you sick?

12. Would you rank 3 main reasons for you to decide (or not) to get the vaccines?

**PROB:** Factors/concerns that motivate or demotivate her.

**Maternal and infant Vaccine Questions:**

1. What do you know about vaccinations in pregnancy and vaccines for infants?
2. Where did you receive this information from?
3. Would you rank the top 3 most trusted sources of information relating to vaccinations?

**PROBE:**

4. Would you get a vaccine for your infant? Why? Why not?
5. Who would you discuss getting your child vaccinated with?

**PROBE:** Family, Healthcare Provider, Peers,

6. Do you believe that children should receive vaccines? Why? Why not?

***Creating Evidence Base for Determinants of Maternal  
Immunization Acceptance in Kenya Protocol V1.3  
English interview guide***

7. Do you believe some mothers should have the liberty to choose NOT to vaccinate themselves and their children? Why? Why not?
8. How would you feel if your child caught a severe illness from another child who was unvaccinated?

Closing Questions:

1. Do you have anything else to say regarding vaccinations?
2. Do you have any questions or comments?

These are all the questions I have for you today. Thank you for taking the time to meet with me today.
